# Supplementary material for: Enhancing the interpretability of transcription factor binding site prediction using attention mechanism
Source: PubMed Central journal article supplement (PMC7414127; doi:10.1038/s41598-020-70218-4), 2020-08-07
Supplement: 41598_2020_70218_MOESM1_ESM.pdf [file 41598_2020_70218_MOESM1_ESM.pdf]

# Supplementary Information

## Enhancing the interpretability of transcription factor binding site prediction using attention mechanism

Sungjoon Park<sup>1,†</sup>, Yookyung Koh<sup>1,†</sup>, Hwisang Jeon<sup>2,†</sup>, Hyunjae Kim<sup>1</sup>, Yoonsun Yeo<sup>1</sup>, and Jaewoo Kang<sup>1,2,\*</sup>

1 .Department of Computer Science and Engineering, Korea University

2. Interdisciplinary Graduate Program in Bioinformatics, Korea University

\*Corresponding author: kangj@korea.ac.kr

†these authors contributed equally to this work

Table S1 : AUROC/AUPR scores on the randomly shuffled test set.

|                | <b>AUROC</b>  | <b>AUPR</b>   |
|----------------|---------------|---------------|
| <b>TBiNet</b>  | <b>0.9147</b> | <b>0.1774</b> |
| <b>DanQ</b>    | 0.8872        | 0.1513        |
| <b>DeepSea</b> | 0.8396        | 0.1185        |

Table S2 : AUROC/AUPR scores on the DNase I hypersensitive sites (DHS) added dataset. DHS labels were added in the target vectors resulting 815 dimensional vector (DHS: 125 + TF-binding: 690).

|                | <b>AUROC</b>  | <b>AUPR</b>   |
|----------------|---------------|---------------|
| <b>TBiNet</b>  | <b>0.9414</b> | <b>0.3459</b> |
| <b>DanQ</b>    | 0.922         | 0.3024        |
| <b>DeepSea</b> | 0.8842        | 0.2446        |
